# Supplementary material for: Yttrium and aluminium complexes bearing dithiodiolate ligands: synthesis and application in cyclic ester polymerization
Source: Royal Society of Chemistry journal article supplement (doi:10.1039/c5dt02938d), 2015-01-01
Supplement: c5dt02938d1.pdf [file c5dt02938d1.pdf]

## Supporting Information

### Yttrium and Aluminium Complexes bearing Dithiodiolate Ligands: Synthesis and Application in Cyclic Esters Polymerization

A. Meduri,<sup>a</sup> M. Cozzolino,<sup>a</sup> S. Milione,<sup>a</sup> K. Press,<sup>b</sup> E. Sergeeva,<sup>b</sup> C. Tedesco,<sup>a</sup> M. Mazzeo<sup>a</sup> and M. Lamberti<sup>c,\*</sup>

<sup>a</sup>Dipartimento di Chimica e Biologia, Università di Salerno, via Giovanni Paolo II 132, I-84084, Fisciano, Salerno, Italy.

<sup>b</sup>School of Chemistry, Raymond and Beverly Sackler Faculty of Exact Sciences, Tel Aviv University, Ramat Aviv, Tel Aviv 69978, Israel

<sup>c</sup>Dipartimento di Fisica "E. Caianiello", Università di Salerno, via Giovanni Paolo II 132, I-84084, Fi-sciano, Salerno, Italy

Corresponding author: [mlamberti@unisa.it](mailto:mlamberti@unisa.it)

#### Table of contents

|                                                                                                                                            |     |
|--------------------------------------------------------------------------------------------------------------------------------------------|-----|
| <b>Figure S1.</b> <sup>1</sup> H NMR of complex <b>1</b> .....                                                                             | S2  |
| <b>Figure S2.</b> <sup>13</sup> C NMR of complex <b>1</b> .....                                                                            | S2  |
| <b>Figure S3.</b> <sup>1</sup> H NMR of complex <b>2</b> .....                                                                             | S3  |
| <b>Figure S4.</b> <sup>13</sup> C NMR of complex <b>2</b> .....                                                                            | S3  |
| <b>Figure S5.</b> <sup>1</sup> H NMR of complex <b>3</b> .....                                                                             | S4  |
| <b>Figure S6.</b> <sup>13</sup> C NMR of complex <b>3</b> .....                                                                            | S4  |
| <b>Figure S7.</b> <sup>1</sup> H NMR of complex <b>4</b> .....                                                                             | S3  |
| <b>Figure S8.</b> <sup>13</sup> C NMR of complex <b>4</b> .....                                                                            | S3  |
| <b>Figure S9.</b> Eyring plot for the temperature-dependent fluxional process for <b>1</b> .....                                           | S6  |
| <b>Figure S10.</b> Plot of $M_{n,GPC}$ of the poly $\epsilon$ -caprolactone versus time .....                                              | S6  |
| <b>Figure S11.</b> ESI-MS spectrum of oligomers of <i>rac</i> -lactide .....                                                               | S8  |
| <b>Figure S12.</b> Homonuclear decoupled <sup>1</sup> H NMR of a PLA sample .....                                                          | S8  |
| <b>Table S1.</b> Selected bond lengths (Å) and angles (°) for <b>2</b> .....                                                               | S8  |
| <b>Table S2.</b> Experimental and Theoretical Tetrad Probabilities .....                                                                   | S8  |
| <b>Table S3.</b> Relationship between $M_n$ and the initial [CL] <sub>0</sub> /[4- <i>i</i> PrOH] molar ratio .....                        | S9  |
| <b>Figure S13.</b> Plot of $M_{n,GPC}$ of the poly $\epsilon$ -caprolactone versus [CL] <sub>0</sub> /[4- <i>i</i> PrOH] molar ratio ..... | S9  |
| <b>Cartesian coordinates and energies of calculated structures</b> .....                                                                   | S10 |

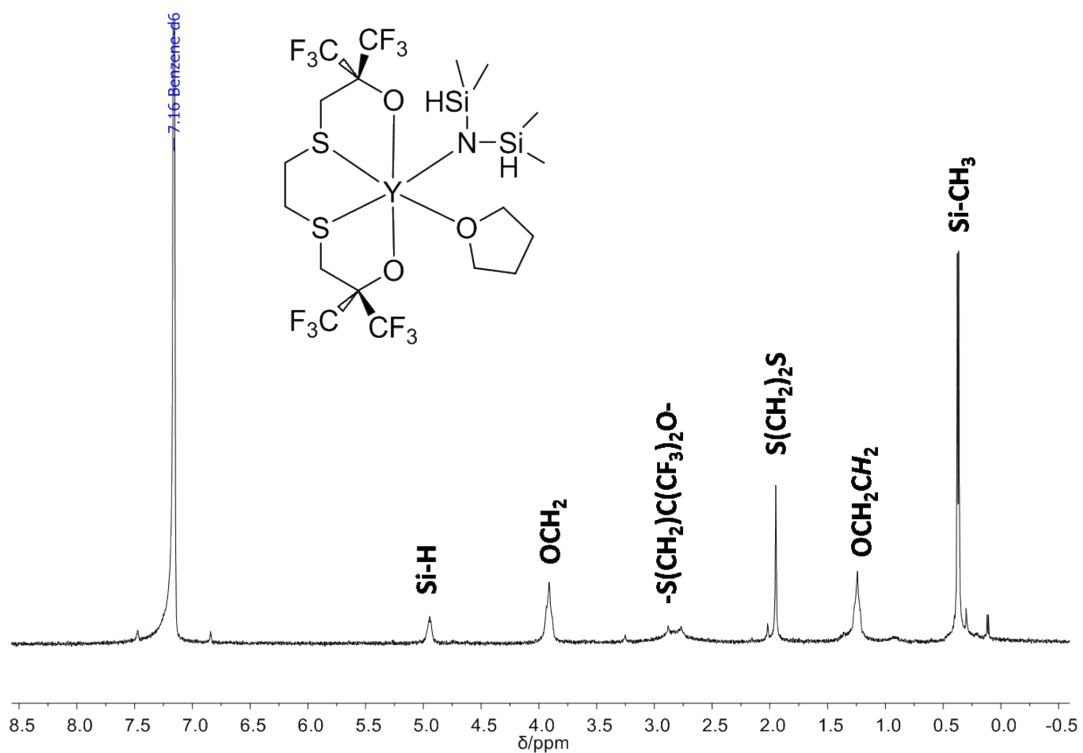

Figure S1.  $^1\text{H}$  NMR (250 MHz,  $\text{C}_6\text{D}_6$ , RT) of complex 1.

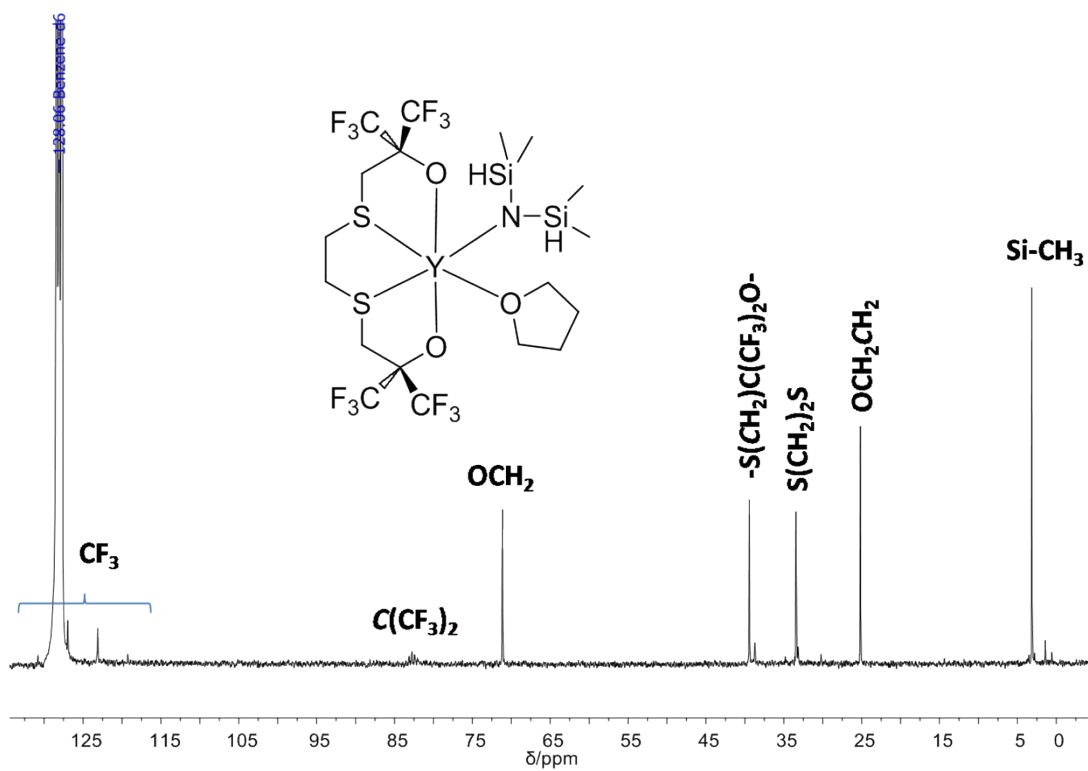

Figure S2.  $^{13}\text{C}$  NMR (75.5 MHz,  $\text{C}_6\text{D}_6$ , RT) of complex 1.

— 7.16 Benzene-d6

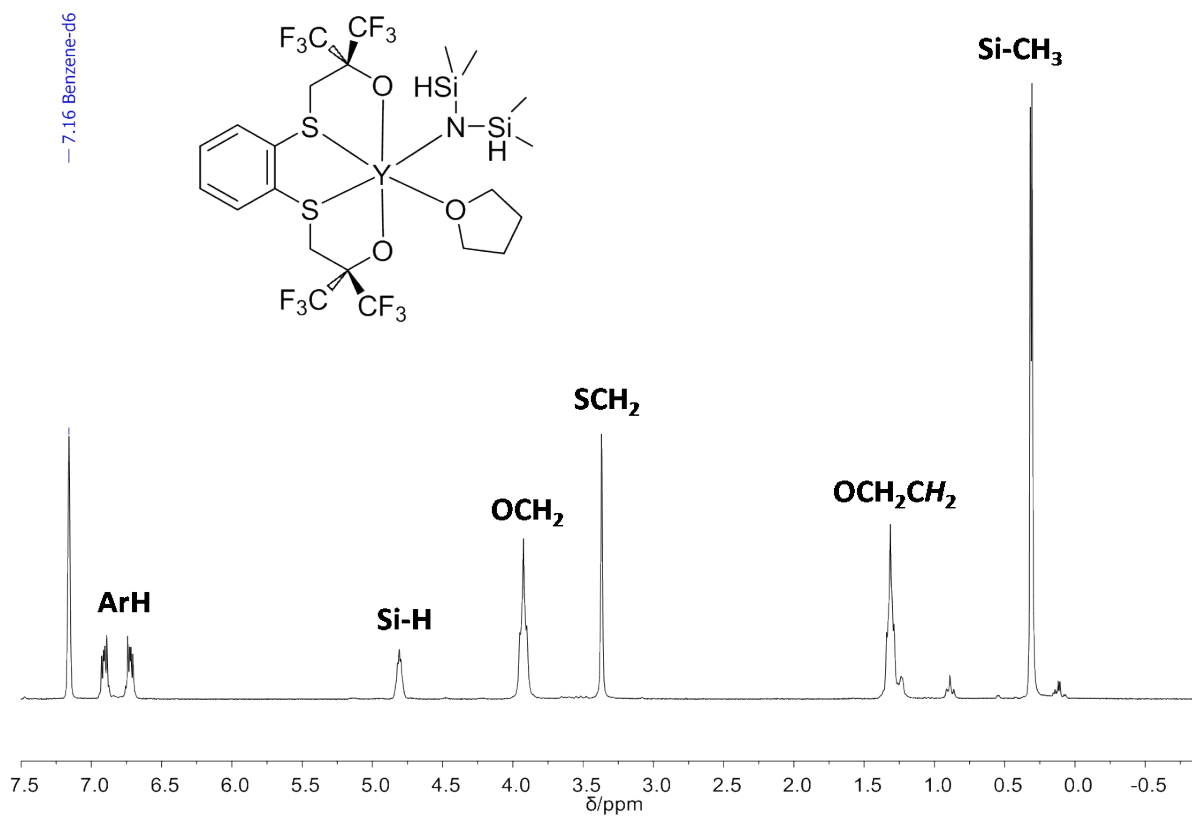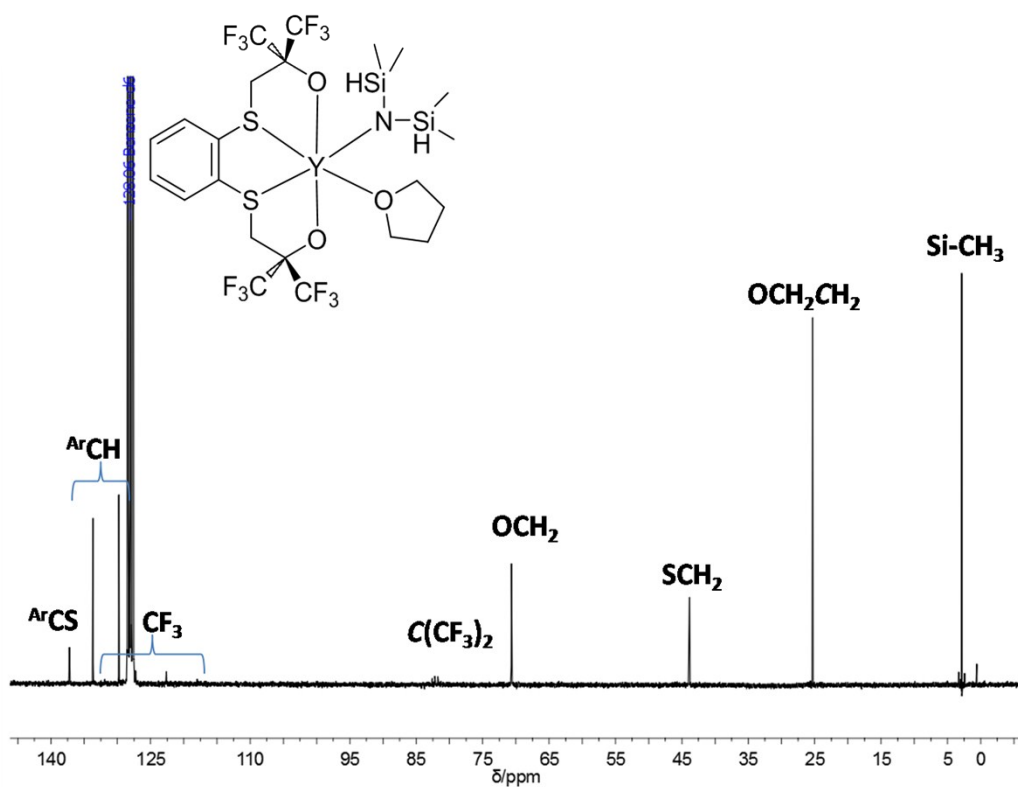

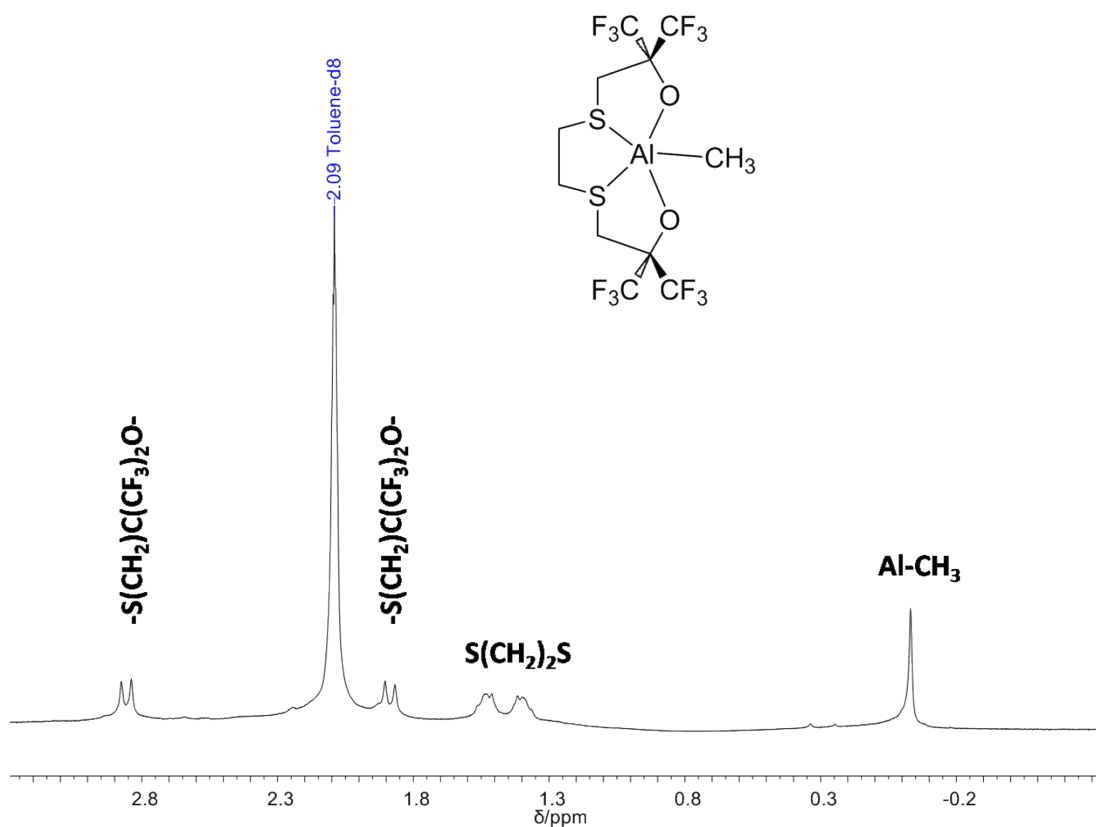

Figure S5.  $^1\text{H}$  NMR (400 MHz, toluene- $d_8$ ,  $-40\text{ }^\circ\text{C}$ ) of complex 3.

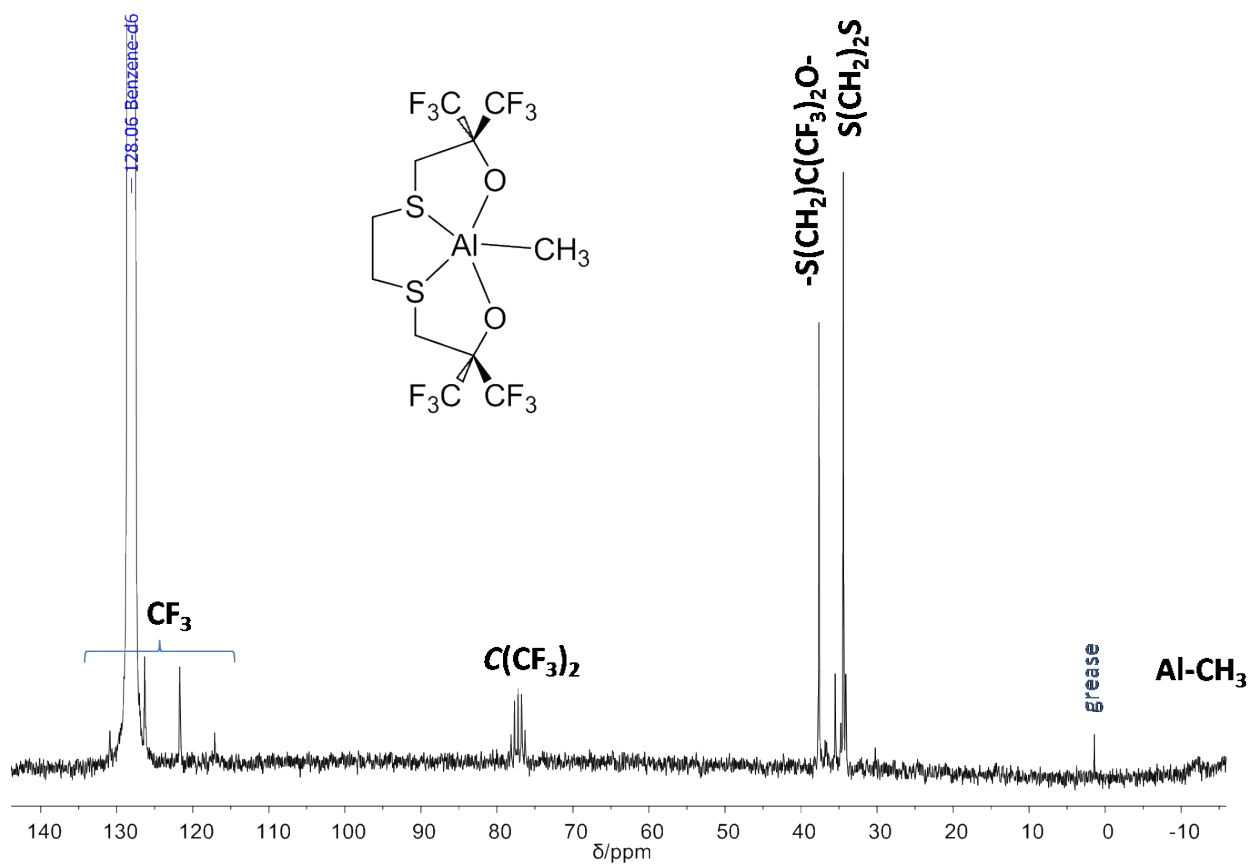

Figure S6.  $^{13}\text{C}$  NMR (62.9 MHz,  $\text{C}_6\text{D}_6$ , RT) of complex 3.

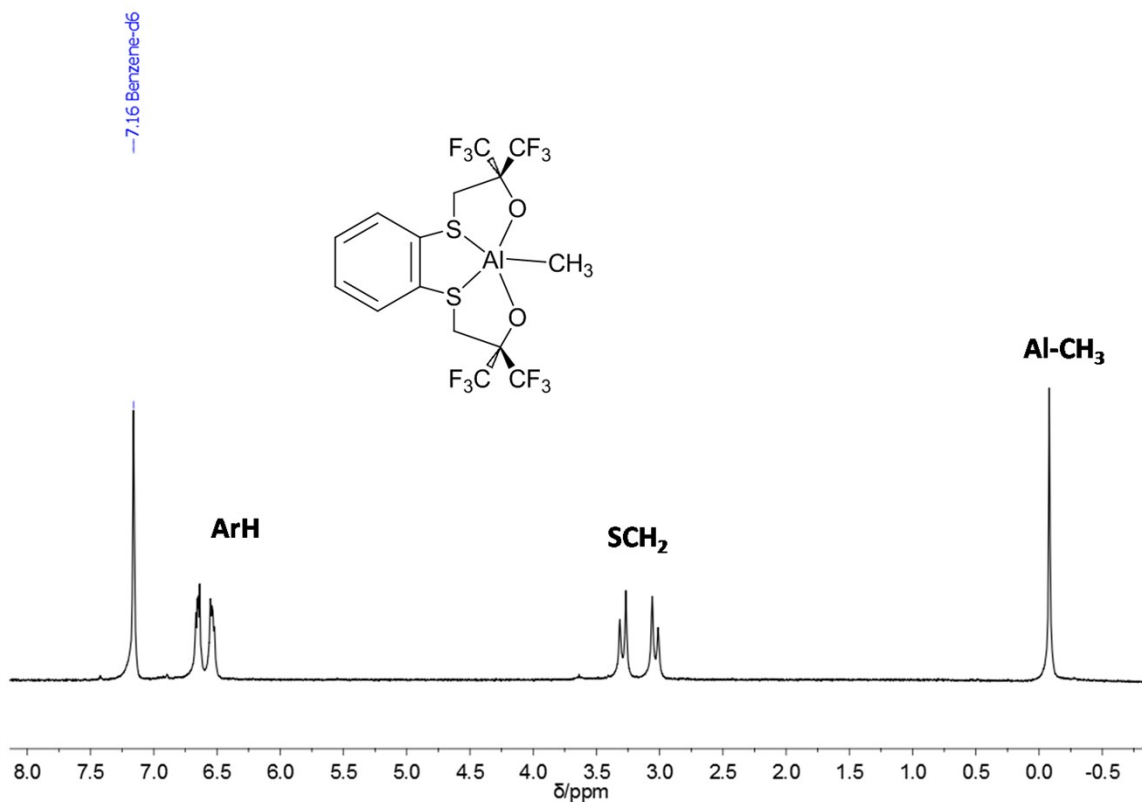

Figure S7.  $^1\text{H}$  NMR (300 MHz,  $\text{C}_6\text{D}_6$ , RT) of complex 4.

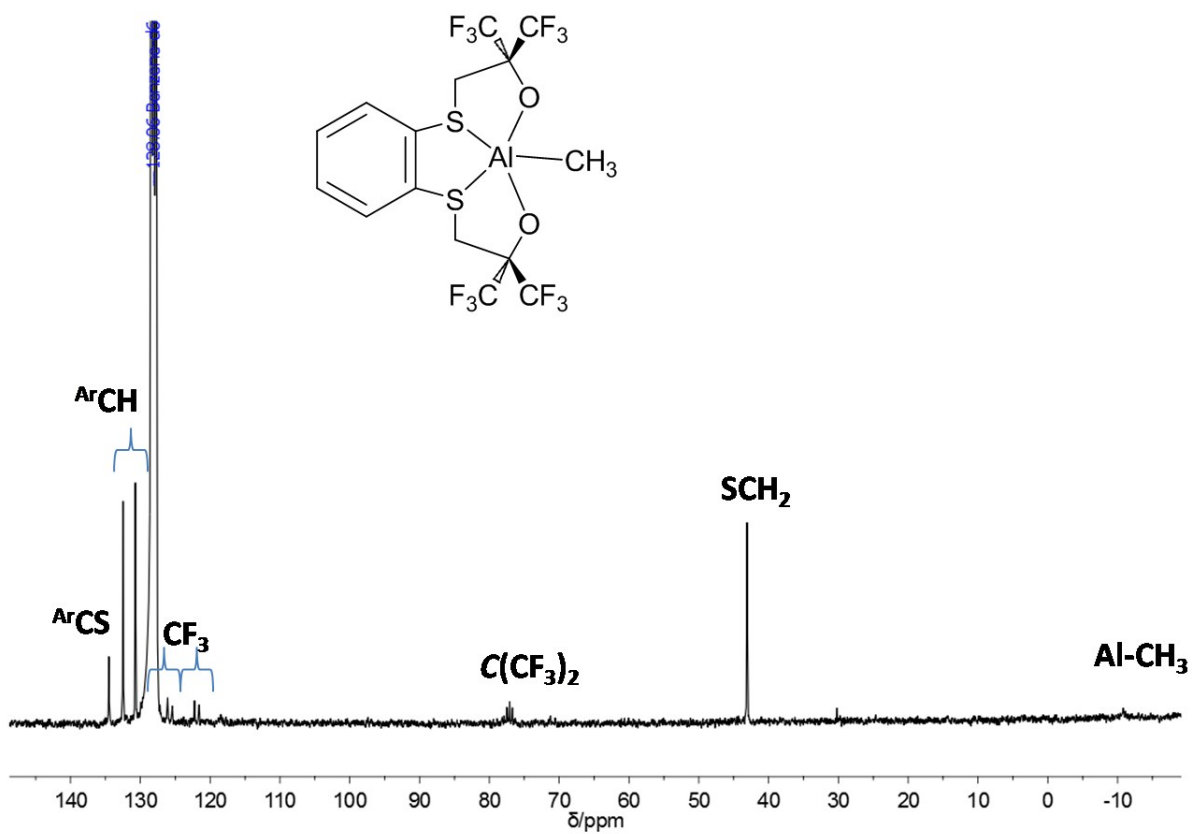

Figure S8.  $^{13}\text{C}$  NMR (62.9 MHz,  $\text{C}_6\text{D}_6$ , RT) of complex 4.

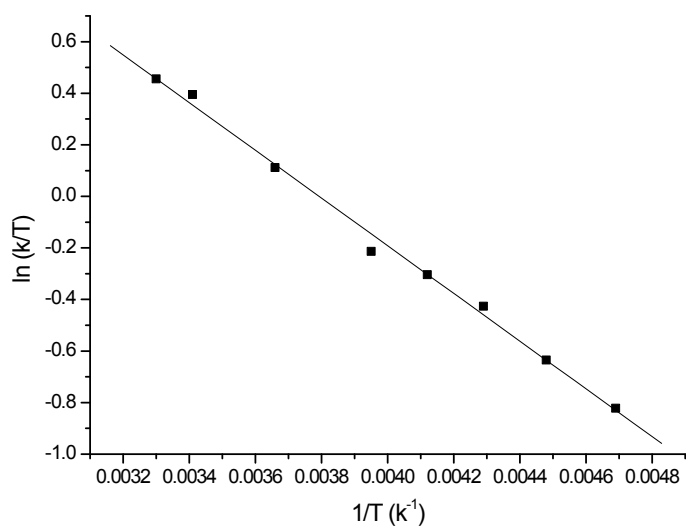

**Figure S9.** Eyring plot for the temperature-dependent fluxional process for **1**.

$A = 3.50988$  (0.10865)

$B = -925.3615$  (27.06213)

$R = -0.99744$  SD = 0.0359

$\Delta H^\ddagger = 1.84$  Kcal/mol  $\Delta S^\ddagger = -40.24$  cal/mol K

$\Delta G^\ddagger = 13.8$  Kcal/mol

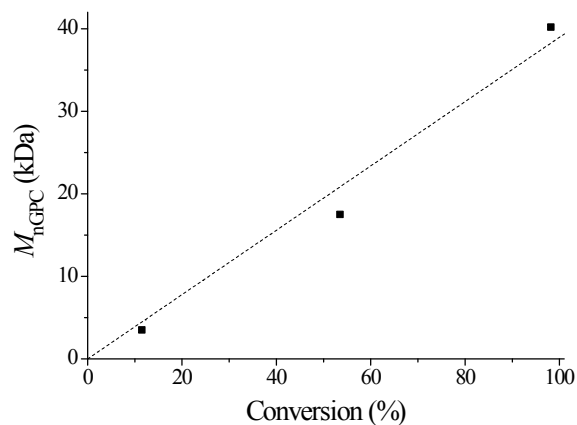

**Figure S10.** Plot of  $M_{n,GPC}$  of the polymer versus conversion. Polymerization of  $\epsilon$ -caprolactone by **1** +  $i$ PrOH (1 equiv) at 70 °C.

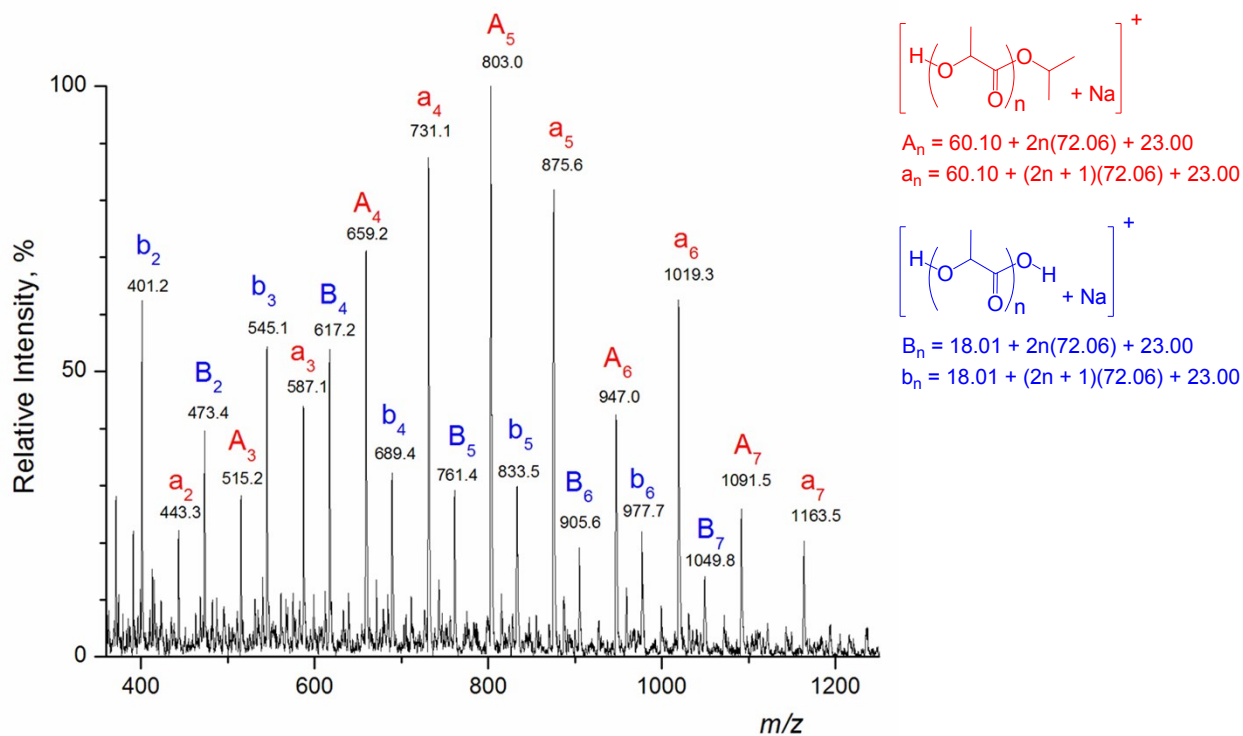

**Figure S11.** ESI mass spectrum of the oligomerization product of *rac*-lactide by **1** (Table 3, run 13).

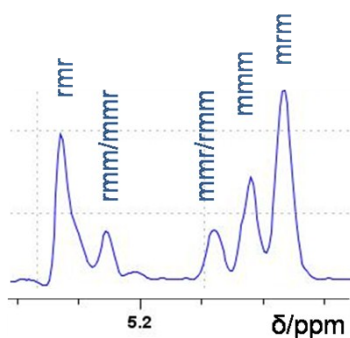

**Figure S12.** Homocoupled decoupled <sup>1</sup>H NMR (600 MHz, CDCl<sub>3</sub>, RT) of the methine region of heterotactically-enriched PLA prepared with complex **1** (Table 2, run 10).

**Table S1.** Selected bond lengths (Å) and angles (°) for **2**.

|          |          |                |            |               |            |
|----------|----------|----------------|------------|---------------|------------|
| Y1 - O1  | 2.153(5) | O1 - Y1 - O2   | 109.26(19) | O1 - Y1 - S1  | 65.64(13)  |
| Y1 - O2  | 2.122(5) | O1 - Y1 - O3   | 83.36(17)  | O2 - Y1 - S1  | 109.22(15) |
| Y1 - N1  | 2.253(6) | O2 - Y1 - O3   | 81.84(18)  | O3 - Y1 - S1  | 148.94(11) |
| Y1 - O3  | 2.358(4) | N1 - Y1 - O1   | 131.0(2)   | O1 - Y1 - S2  | 125.82(13) |
| Y1 - S1  | 2.980(2) | N1 - Y1 - O2   | 118.1(2)   | O2 - Y1 - S2  | 67.02(13)  |
| Y1 - S2  | 3.046(3) | N1 - Y1 - O3   | 91.26(19)  | O3 - Y1 - S2  | 142.32(12) |
| Si1 - N1 | 1.715(6) | N1 - Y1 - S1   | 107.27(15) | S1 - Y1 - S2  | 65.72(6)   |
| Si2 - N1 | 1.708(6) | N1 - Y1 - S2   | 85.61(16)  | Si2 - N1 - Y1 | 122.3(3)   |
| Y1...Si1 | 3.230(3) | Si2 - N1 - Si1 | 129.2(4)   | Si1 - N1 - Y1 | 108.2(3)   |
| Y1...Si2 | 3.480(3) |                |            |               |            |

**Table S2.** Tetrad probabilities based on Bernoullian Statistic (Th) for a  $P_r$  of 0.72 and experimental values (Exp) as obtained by NMR analysis.

| <b>Tetrad</b>  | <b>Formula</b>          | <b>Exp</b> | <b>Th</b> |
|----------------|-------------------------|------------|-----------|
| [ <i>mmm</i> ] | $P_m^2 + P_r P_m / 2$   | 0.18       | 0.18      |
| [ <i>mmr</i> ] | $P_r P_m / 2$           | 0.10       | 0.10      |
| [ <i>rrm</i> ] | $P_r P_m / 2$           | 0.09       | 0.10      |
| [ <i>rrr</i> ] | $P_r^2 / 2$             | 0.26       | 0.26      |
| [ <i>rrm</i> ] | $(P_r^2 + P_r P_m) / 2$ | 0.37       | 0.36      |



**Table S3.** Polymerization of  $\epsilon$ -caprolactone by **4** +  $i$ PrOH. Relationship between  $M_n$  of the obtained polymer and the initial mole ratio  $[\text{CL}]_0/[\mathbf{4}\text{-}i\text{PrOH}]$

| Run | $[\epsilon\text{-CL}]/[\text{Al}]$ | Yield <sup>b</sup><br>(%) | $M_{n,\text{th}}^c$<br>(kDa) | $M_n^{d,e}$<br>(kDa) | $M_w/M_n^d$ |
|-----|------------------------------------|---------------------------|------------------------------|----------------------|-------------|
| 14  | 25                                 | 98                        | 2.8                          | 3.1                  | 1.14        |
| 15  | 50                                 | 72                        | 4.1                          | 3.5                  | 1.16        |
| 16  | 250                                | 99                        | 28.2                         | 25.7                 | 1.21        |
| 17  | 500                                | 80                        | 45.7                         | 50.2                 | 1.66        |

**“Polymerization conditions:** precatalyst **4**: 10  $\mu\text{mol}$ ;  $i$ PrOH: 10  $\mu\text{mol}$ ; 10  $\mu\text{L}$  of a 0.1 M toluene solution; toluene: 2 mL; temperature: 70°C; polymerization time: 6h. <sup>b</sup> Determined by  $^1\text{H}$  NMR ( $\text{CDCl}_3$ , RT). <sup>c</sup>Theoretical molecular masses. <sup>d</sup>Molecular masses and their dispersities as determined by GPC (THF, 35°C) vs. polystyrene standards and corrected by 0.56 factor.

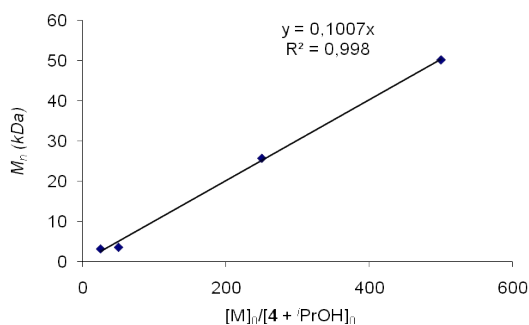

**Figure S13.** Relationship between  $M_n$  of the obtained PCL and the initial mole ratio  $[\text{CL}]_0/[\mathbf{4}\text{-}i\text{PrOH}]$  for the polymerization of  $\epsilon$ -CL (data reported in Table S3)

## Cartesian coordinates and energies of calculated structures

### L<sup>2</sup>YOiPr(THF)

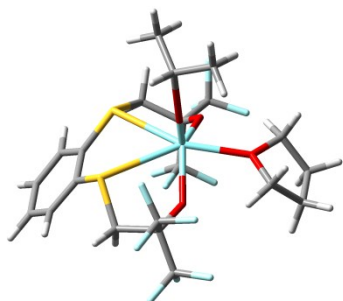

Charge = 0

Multiplicity = 1

|   |           |           |           |
|---|-----------|-----------|-----------|
| Y | -0.073317 | -0.767350 | 0.647262  |
| S | -1.227005 | 2.035480  | 1.230398  |
| S | 1.865824  | 1.389267  | 1.742363  |
| F | 4.859811  | -1.549867 | 0.490873  |
| F | 4.067197  | -2.078685 | -1.476364 |
| F | 5.208499  | -0.214372 | -1.222420 |
| F | 1.121655  | 0.819778  | -1.353359 |
| F | 2.421159  | -0.365751 | -2.657950 |
| F | 3.117824  | 1.570169  | -1.904171 |
| F | -3.923610 | -0.492694 | -2.443161 |
| F | -4.390326 | 1.638405  | -2.172527 |
| F | -2.414336 | 1.028423  | -2.907934 |
| F | -3.496896 | 0.197416  | 1.680805  |
| F | -4.350372 | -1.124197 | 0.153519  |
| F | -5.077163 | 0.940103  | 0.346623  |
| O | -1.809673 | -0.267443 | -0.562712 |
| O | 2.036682  | -1.159376 | 0.168486  |
| O | -0.334792 | -2.833829 | -0.558535 |
| C | 0.029291  | 3.211559  | 0.709534  |
| C | -0.337601 | 4.455004  | 0.151627  |
| H | -1.397803 | 4.690580  | 0.011051  |
| C | 0.637221  | 5.388613  | -0.220817 |
| H | 0.333236  | 6.341675  | -0.666768 |
| C | 1.995127  | 5.111152  | 0.007310  |
| H | 2.763487  | 5.845048  | -0.258163 |
| C | 2.369493  | 3.899352  | 0.600429  |
| H | 3.426591  | 3.703509  | 0.808418  |
| C | 1.402256  | 2.929025  | 0.932000  |
| C | -2.404341 | 2.078218  | -0.199400 |
| H | -3.269965 | 2.714031  | 0.044108  |
| H | -1.855160 | 2.506978  | -1.051664 |
| C | 3.341199  | 0.790688  | 0.808569  |
| H | 3.922541  | 1.638137  | 0.414543  |
| H | 3.945141  | 0.277571  | 1.572361  |
| C | -2.840821 | 0.620561  | -0.584005 |
| C | -3.966880 | 0.151119  | 0.395696  |
| C | -3.410610 | 0.697563  | -2.042537 |
| C | 2.969481  | -0.274616 | -0.281962 |
| C | 2.440712  | 0.442587  | -1.574432 |
| C | 4.291380  | -1.041441 | -0.635875 |

|   |           |           |           |
|---|-----------|-----------|-----------|
| C | -1.546631 | -3.314234 | -1.213636 |
| H | -2.237452 | -2.460137 | -1.250043 |
| H | -1.975356 | -4.124338 | -0.591216 |
| C | -1.077157 | -3.834895 | -2.589570 |
| H | -1.622568 | -4.751696 | -2.871347 |
| H | -1.259583 | -3.081893 | -3.374212 |
| C | 0.453979  | -4.085375 | -2.409290 |
| H | 1.036669  | -3.401961 | -3.049402 |
| H | 0.748482  | -5.118201 | -2.661722 |
| C | 0.717021  | -3.774251 | -0.924311 |
| H | 0.613675  | -4.675850 | -0.288058 |
| H | 1.671633  | -3.269352 | -0.717037 |
| O | -0.480883 | -1.452680 | 2.520740  |
| C | -0.763389 | -1.928023 | 3.818821  |
| H | -1.613189 | -1.339697 | 4.232809  |
| C | 0.457710  | -1.722358 | 4.732832  |
| H | 0.245573  | -2.048606 | 5.768193  |
| H | 1.318639  | -2.302459 | 4.351562  |
| H | 0.742980  | -0.655587 | 4.755892  |
| C | -1.189790 | -3.405843 | 3.759489  |
| H | -0.358534 | -4.027300 | 3.377360  |
| H | -1.473771 | -3.780807 | 4.760375  |
| H | -2.054549 | -3.527331 | 3.083493  |

$E = -3147.71426332$  A.U.

$E + ZPE = -3147.288865$  A.U.

$G = -3147.373681$  A.U.

### [L<sup>2</sup>YOiPr]<sub>2</sub>

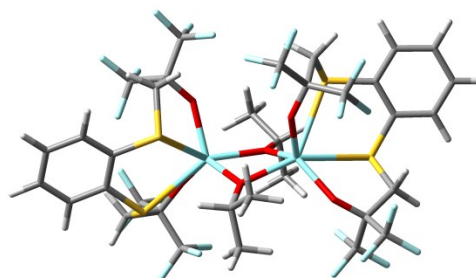

Charge = 0

Multiplicity = 1

|   |          |           |           |
|---|----------|-----------|-----------|
| Y | 1.744849 | -0.315470 | 0.248060  |
| S | 3.898321 | -1.386373 | -1.672014 |
| S | 2.712506 | 1.675482  | -1.909185 |
| F | 0.881767 | 4.173656  | 1.097224  |
| F | 2.155097 | 3.795404  | 2.836952  |
| F | 2.845269 | 5.145960  | 1.246068  |
| F | 4.807347 | 1.469526  | 0.579077  |
| F | 4.327453 | 2.289955  | 2.549437  |
| F | 5.069832 | 3.616881  | 0.963947  |
| F | 4.374966 | -3.148830 | 3.215326  |
| F | 6.013729 | -3.657798 | 1.841592  |
| F | 5.645677 | -1.563630 | 2.398859  |
| F | 2.493102 | -3.718392 | -0.486403 |

|   |           |           |           |
|---|-----------|-----------|-----------|
| F | 2.684533  | -4.425888 | 1.580061  |
| F | 4.265905  | -4.867178 | 0.125246  |
| O | 3.111822  | -1.636601 | 1.216040  |
| O | 2.049494  | 1.657273  | 0.997754  |
| C | 4.926406  | -0.016876 | -2.230401 |
| C | 4.425415  | 1.306726  | -2.318515 |
| C | 4.954821  | -2.098143 | -0.318423 |
| H | 5.564102  | -2.925698 | -0.712955 |
| H | 5.606363  | -1.283235 | 0.029835  |
| C | 2.786588  | 3.144220  | -0.792909 |
| H | 3.620040  | 3.803974  | -1.080212 |
| H | 1.839465  | 3.663997  | -1.008387 |
| C | 4.068736  | -2.555987 | 0.887685  |
| C | 3.384456  | -3.919485 | 0.541391  |
| C | 5.035088  | -2.743642 | 2.109100  |
| C | 2.795674  | 2.768873  | 0.732789  |
| C | 4.264319  | 2.548608  | 1.226080  |
| C | 2.171611  | 3.986922  | 1.499815  |
| O | 0.184596  | -0.667176 | -1.345659 |
| O | -0.182895 | -0.670879 | 1.343090  |
| H | -5.559111 | -2.929696 | 0.713641  |
| C | -4.950896 | -2.101522 | 0.318757  |
| S | -3.893090 | -1.389715 | 1.671275  |
| H | -5.603460 | -1.286939 | -0.028362 |
| C | -4.065781 | -2.558278 | -0.888513 |
| C | -4.921412 | -0.021827 | 2.232902  |
| O | -3.109444 | -1.638391 | -1.217154 |
| C | -3.380738 | -3.921809 | -0.543871 |
| C | -5.033255 | -2.745337 | -2.109126 |
| C | -4.421451 | 1.302132  | 2.321446  |
| F | -4.261633 | -4.870314 | -0.128337 |
| F | -2.681069 | -4.426817 | -1.583402 |
| F | -2.489030 | -3.721425 | 0.483687  |
| F | -4.374176 | -3.149961 | -3.216191 |
| F | -6.011610 | -3.659671 | -1.841152 |
| F | -5.644146 | -1.565206 | -2.397680 |
| S | -2.709926 | 1.673551  | 1.908559  |
| O | -2.058259 | 1.654804  | -1.000671 |
| C | -2.788788 | 3.142210  | 0.792514  |
| C | -2.802474 | 2.767042  | -0.733276 |
| H | -3.621864 | 3.801264  | 1.082535  |
| H | -1.841432 | 3.662737  | 1.005213  |
| C | -4.272673 | 2.547885  | -1.222444 |
| C | -2.179643 | 3.984759  | -1.501804 |
| F | -4.815031 | 1.469780  | -0.573467 |
| F | -5.076351 | 3.617214  | -0.958656 |
| F | -4.339583 | 2.288725  | -2.545510 |
| F | -2.168395 | 3.794166  | -2.839135 |
| F | -0.888055 | 4.169471  | -1.103931 |
| F | -2.850802 | 5.144523  | -1.244745 |
| Y | -1.743626 | -0.315636 | -0.249950 |
| C | 0.305019  | -0.963456 | -2.762338 |
| H | 1.311166  | -0.622346 | -3.087285 |
| C | -0.303231 | -0.966995 | 2.759803  |
| H | -1.309849 | -0.627047 | 3.084540  |
| C | -0.198654 | -2.481498 | 2.980481  |
| H | -0.964135 | -3.019507 | 2.396039  |
| H | 0.797129  | -2.846537 | 2.672158  |
| H | -0.343260 | -2.728909 | 4.048339  |
| C | 0.744974  | -0.190550 | 3.568723  |
| H | 0.694841  | 0.889972  | 3.354141  |

|   |           |           |           |
|---|-----------|-----------|-----------|
| H | 0.581101  | -0.342737 | 4.651305  |
| H | 1.765890  | -0.549725 | 3.336145  |
| C | 0.202058  | -2.478126 | -2.982745 |
| H | 0.968284  | -3.015275 | -2.398469 |
| H | -0.793242 | -2.844229 | -2.674083 |
| H | 0.346620  | -2.725557 | -4.050604 |
| C | -0.744345 | -0.188391 | -3.571078 |
| H | -0.695744 | 0.892166  | -3.356335 |
| H | -0.580325 | -0.340168 | -4.653692 |
| H | -1.764764 | -0.548961 | -3.338484 |
| C | -6.242841 | -0.291896 | 2.650090  |
| H | -6.616644 | -1.320683 | 2.611094  |
| C | -7.075032 | 0.736775  | 3.107386  |
| H | -8.102579 | 0.510343  | 3.411225  |
| C | -6.577108 | 2.047063  | 3.201530  |
| H | -7.211515 | 2.855062  | 3.581305  |
| C | -5.254072 | 2.319068  | 2.834302  |
| H | -4.858125 | 3.334419  | 2.944303  |
| C | 6.248955  | -0.285255 | -2.645125 |
| H | 6.623630  | -1.313739 | -2.606533 |
| C | 7.081194  | 0.744710  | -3.099418 |
| H | 8.109578  | 0.519556  | -3.401369 |
| C | 6.582324  | 2.054680  | -3.192945 |
| H | 7.216831  | 2.863728  | -3.570312 |
| C | 5.258255  | 2.325058  | -2.828249 |
| H | 4.861706  | 3.340218  | -2.937857 |

$E = -5830.54751481$  A.U.

$E + ZPE = -5829.926519$  A.U.

$G = -5830.046465$  A.U.

## THF

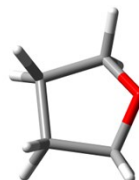

Charge = 0

Multiplicity = 1

|   |           |           |           |
|---|-----------|-----------|-----------|
| O | -0.746084 | -2.621183 | -1.223265 |
| C | 0.064347  | -3.801842 | -1.269104 |
| C | -1.221083 | -2.456591 | -2.564856 |
| C | -0.696409 | -4.804523 | -2.175255 |
| H | 1.064531  | -3.569148 | -1.701605 |
| H | 0.206232  | -4.147717 | -0.231149 |
| C | -1.585944 | -3.878955 | -3.062014 |
| H | -2.072821 | -1.756187 | -2.532219 |
| H | -0.425565 | -2.012793 | -3.206654 |
| H | -1.320006 | -5.485520 | -1.571235 |
| H | -0.003892 | -5.425386 | -2.769671 |
| H | -2.656368 | -4.089484 | -2.896441 |
| H | -1.384614 | -4.000700 | -4.140436 |

$E = -232.44770068$  A.U.

$E + ZPE = -232.333437$  A.U.

$G = -232.361750$  A.U.
